# Supplementary material
Source: publisher site journal article supplement (https://www.spandidos-publications.com/6175/downloadSupplementary)
Supplement: Supplementary file 1 [file downloadSupplementary]

Table SI. Results of the Pittsburgh Sleep Quality Index questionnaire (mean values in study population).

| Question                                                                                                                                  | Mean                                |                              |                             |                                      |
|-------------------------------------------------------------------------------------------------------------------------------------------|-------------------------------------|------------------------------|-----------------------------|--------------------------------------|
| 1. During the past month, what time have you usually gone to bed at night?                                                                | 23:40 (h:min)                       |                              |                             |                                      |
| 2. During the past month, how long (in min) has it usually taken you to fall asleep each night?                                           | 18 (min)                            |                              |                             |                                      |
| 3. During the past month, what time have you usually gotten up in the morning?                                                            | 07:27 (h:min)                       |                              |                             |                                      |
| 4. During the past month, how many h of actual sleep did you get at night? (This may be different than the number of h you spent in bed.) | 6.8 (h)                             |                              |                             |                                      |
|                                                                                                                                           | Not during the<br>past month<br>(%) | Less than once<br>a week (%) | Once or twice a<br>week (%) | Three or more<br>times a week<br>(%) |
| 5. During the past month, how often have you had trouble sleeping because you...                                                          |                                     |                              |                             |                                      |
| a. Cannot get to sleep within 30 min                                                                                                      | 46.5                                | 34.5                         | 11.2                        | 7.8                                  |
| b. Wake up in the middle of the night or early morning                                                                                    | 49.2                                | 28.7                         | 14.0                        | 8.1                                  |
| c. Have to get up to use the bathroom                                                                                                     | 57.0                                | 25.2                         | 13.5                        | 4.3                                  |
| d. Cannot breathe comfortably                                                                                                             | 89.5                                | 8.5                          | 1.6                         | 0.4                                  |
| e. Cough or snore loudly                                                                                                                  | 82.6                                | 10.5                         | 3.8                         | 3.1                                  |
| f. Feel too cold                                                                                                                          | 70.2                                | 26.0                         | 3.8                         | 0.0                                  |
| g. Feel too hot                                                                                                                           | 67.1                                | 23.6                         | 8.5                         | 0.8                                  |
| h. Have bad dreams                                                                                                                        | 60.5                                | 30.6                         | 6.2                         | 2.7                                  |
| i. Have pain                                                                                                                              | 77.9                                | 17.1                         | 4.3                         | 0.7                                  |
| j. Other reason(s), please describe:                                                                                                      | 80.6                                | 19.4                         | 0.0                         | 0.0                                  |
| 6. During the past month, how often have you taken medicine to help you sleep (prescribed or “over the counter”)?                         | 95.3                                | 3.5                          | 0.8                         | 0.4                                  |
| 7. During the past month, how often have you had trouble staying awake while driving, eating meals, or engaging in social activity?       | 85.3                                | 12.7                         | 1.2                         | 0.8                                  |

|                                                                                                                      | No problem at all (%)          | Only a very slight problem (%)     | Somewhat of a problem (%)                 | A very big problem (%)         |
|----------------------------------------------------------------------------------------------------------------------|--------------------------------|------------------------------------|-------------------------------------------|--------------------------------|
| 8. During the past month, how much of a problem has it been for you to keep up enough enthusiasm to get things done? | 36.8                           | 47.3                               | 14.3                                      | 1.6                            |
|                                                                                                                      | Very good (%)                  | Fairly good (%)                    | Fairly bad (%)                            | Very bad (%)                   |
| 9. During the past month, how would you rate your sleep quality overall?                                             | 15.9                           | 69.0                               | 13.6                                      | 1.5                            |
|                                                                                                                      | No bed partner or roommate (%) | Partner/roommate in other room (%) | Partner in same room but not same bed (%) | Partner in same bed (%)        |
| 10. Do you have a bed partner or roommate?                                                                           | 38.8                           | 3.4                                | 0.4                                       | 57.4                           |
|                                                                                                                      | Not during the past month (%)  | Less than once a week (%)          | Once or twice a week (%)                  | Three or more times a week (%) |
| If you have a roommate or bed partner, ask him/her how often in the past month you have had:                         |                                |                                    |                                           |                                |
| a. Loud snoring                                                                                                      | 80.4                           | 9.2                                | 5.9                                       | 4.5                            |
| b. Long pauses between breaths while asleep                                                                          | 91.1                           | 7.9                                | 0.6                                       | 0.4                            |
| c. Legs twitching or jerking while you sleep                                                                         | 83.2                           | 13.9                               | 2.9                                       | 0.0                            |
| d. Episodes of disorientation or confusion during sleep                                                              | 85.5                           | 12.6                               | 1.5                                       | 0.4                            |
| e. Other restlessness while you sleep, please describe:                                                              | 87.8                           | 8.6                                | 3.2                                       | 0.4                            |
